# Supplementary material for: Exercise capacity and physical activity in COPD patients treated with a LAMA/LABA combination: a systematic review and meta-analysis
Source: PubMed Central journal article supplement (PMC9753337; doi:10.1186/s12931-022-02268-3), 2022-12-15
Supplement: 12931_2022_2268_MOESM1_ESM.pdf [file 12931_2022_2268_MOESM1_ESM.pdf]

|                        | Random sequence generation (selection bias) | Allocation concealment (selection bias) | Blinding of participants and personnel (performance bias) | Blinding of outcome assessment (detection bias) | Incomplete outcome data (attrition bias) | Selective reporting (reporting bias) | Other bias |
|------------------------|---------------------------------------------|-----------------------------------------|-----------------------------------------------------------|-------------------------------------------------|------------------------------------------|--------------------------------------|------------|
| Canto., 2012           | +                                           | ?                                       | +                                                         | ?                                               | +                                        | +                                    | +          |
| Ichinose., 2018        | +                                           | +                                       | +                                                         | +                                               | +                                        | +                                    | +          |
| Jayaram., 2013         | +                                           | -                                       | +                                                         | ?                                               | +                                        | +                                    | +          |
| Maltais., 2014         | +                                           | +                                       | +                                                         | ?                                               | ?                                        | +                                    | +          |
| Maltais., 2018         | +                                           | ?                                       | +                                                         | ?                                               | -                                        | +                                    | +          |
| Maltais., 2020         | +                                           | ?                                       | +                                                         | ?                                               | +                                        | +                                    | +          |
| Minakata., 2019        | +                                           | +                                       | +                                                         | +                                               | +                                        | +                                    | +          |
| O'Donnell., 2017       | +                                           | ?                                       | +                                                         | ?                                               | +                                        | +                                    | +          |
| O'Donnell., 2018       | +                                           | ?                                       | +                                                         | ?                                               | ?                                        | +                                    | +          |
| Riley., 2018           | +                                           | +                                       | +                                                         | ?                                               | +                                        | +                                    | +          |
| Singh., 2018           | +                                           | ?                                       | +                                                         | ?                                               | ?                                        | +                                    | +          |
| Stringer., 2021        | +                                           | +                                       | +                                                         | ?                                               | +                                        | +                                    | +          |
| Takahashi et al., 2020 | +                                           | -                                       | -                                                         | ?                                               | +                                        | +                                    | +          |
| Troosters., 2018       | +                                           | ?                                       | -                                                         | ?                                               | +                                        | +                                    | +          |
| Tufvesson., 2021       | +                                           | ?                                       | +                                                         | ?                                               | +                                        | -                                    | ?          |
| Watz., 2016            | +                                           | ?                                       | +                                                         | +                                               | +                                        | +                                    | +          |
| Watz., 2017            | +                                           | ?                                       | +                                                         | ?                                               | +                                        | +                                    | +          |
